# Supplementary material for: Multivariate Quantification of the Solid State Phase Composition of Co-Amorphous Naproxen-Indomethacin
Source: Molecules. 2015 Oct 27;20(10):19571–87. doi: 10.3390/molecules201019571 (PMC6332358; doi:10.3390/molecules201019571)
Supplement: Supplementary file 1 [file molecules-20-19571-s001.xlsx]

## Sheet: Table S1
	5.00357	5.0167	5.02983	5.04296	5.05609	5.06922	5.08235	5.09548	5.10861	5.12174	5.13487	5.148	5.16113	5.17426	5.18739	5.20052	5.21365	5.22678	5.23991	5.25304	5.26617	5.2793	5.29243	5.30556	5.31869	5.33182	5.34495	5.35808	5.37121	5.38434	5.39747	5.4106	5.42373	5.43686	5.45	5.46312	5.47626	5.48939	5.50252	5.51565	5.52878	5.54191	5.55504	5.56817	5.5813	5.59443	5.60756	5.62069	5.63382
BCS1-1	1700	1662	1585	1588	1698	1674	1584	1632	1583	1614	1758	1681	1650	1670	1717	1650	1722	1621	1688	1635	1733	1662	1594	1696	1699	1664	1715	1702	1706	1689	1662	1679	1668	1688	1721	1697	1787	1666	1742	1714	1708	1750	1673	1716	1743	1777	1728	1711	1706
BCS1-2	1605	1538	1502	1608	1540	1529	1582	1582	1560	1546	1633	1598	1577	1601	1648	1506	1589	1594	1537	1594	1595	1639	1583	1624	1630	1611	1640	1574	1535	1595	1642	1662	1595	1562	1631	1686	1625	1667	1639	1663	1553	1585	1596	1653	1705	1670	1734	1596	1667
BCS2-1	1675	1565	1606	1676	1583	1617	1696	1622	1622	1685	1697	1652	1647	1686	1664	1642	1695	1718	1658	1655	1614	1682	1719	1732	1683	1641	1713	1660	1769	1726	1674	1658	1667	1728	1791	1782	1737	1768	1727	1754	1720	1702	1716	1721	1721	1715	1726	1732	1706
BCS2-2	1587	1600	1544	1586	1639	1546	1469	1637	1555	1553	1630	1639	1707	1529	1573	1549	1582	1507	1584	1601	1654	1598	1552	1597	1548	1618	1563	1559	1558	1683	1553	1726	1638	1627	1620	1647	1627	1675	1594	1699	1720	1719	1649	1631	1648	1606	1603	1605	1743
BCS4-1	1489	1545	1503	1583	1561	1528	1453	1585	1512	1589	1532	1575	1545	1576	1463	1582	1580	1603	1542	1517	1595	1594	1547	1546	1508	1475	1521	1532	1634	1572	1552	1568	1574	1558	1607	1611	1651	1532	1630	1567	1534	1608	1640	1595	1605	1566	1646	1603	1596
BCS4-2	1540	1490	1468	1429	1526	1516	1519	1509	1530	1504	1480	1531	1486	1457	1448	1531	1519	1587	1509	1519	1528	1541	1558	1531	1698	1565	1515	1469	1561	1483	1566	1583	1598	1532	1521	1595	1500	1576	1544	1549	1556	1530	1580	1619	1504	1521	1592	1587	1519
BCS5-1	1591	1544	1543	1551	1496	1538	1517	1551	1495	1557	1533	1530	1607	1543	1648	1547	1569	1491	1581	1587	1611	1628	1442	1562	1635	1557	1551	1549	1578	1546	1500	1619	1614	1562	1518	1582	1610	1610	1608	1630	1561	1592	1607	1653	1567	1664	1603	1523	1639
BCS5-2	1425	1431	1462	1425	1505	1480	1468	1456	1508	1443	1463	1479	1450	1503	1472	1436	1453	1520	1480	1482	1448	1426	1549	1457	1503	1484	1469	1398	1533	1485	1506	1525	1529	1487	1526	1551	1548	1499	1491	1458	1481	1517	1490	1494	1544	1456	1467	1507	1530
BCS7-1	1517	1421	1445	1381	1423	1431	1418	1431	1472	1516	1399	1441	1445	1494	1449	1480	1434	1495	1438	1482	1442	1443	1450	1533	1500	1439	1470	1405	1577	1509	1461	1489	1489	1506	1580	1509	1501	1458	1494	1495	1473	1550	1535	1462	1442	1488	1588	1508	1508
BCS7-2	1388	1293	1390	1358	1322	1331	1293	1281	1352	1364	1433	1320	1317	1331	1335	1351	1393	1330	1325	1364	1340	1332	1312	1380	1348	1337	1365	1388	1304	1330	1377	1351	1377	1347	1323	1382	1278	1282	1312	1421	1326	1375	1367	1348	1409	1409	1378	1362	1394
BCS8-1	1525	1516	1475	1481	1410	1537	1520	1600	1526	1417	1551	1431	1548	1482	1472	1522	1461	1499	1665	1504	1479	1572	1580	1502	1492	1608	1553	1534	1524	1475	1487	1519	1566	1574	1584	1578	1568	1503	1515	1499	1641	1560	1578	1498	1479	1617	1568	1539	1576
BCS8-2	1333	1427	1399	1378	1394	1371	1428	1354	1382	1390	1404	1380	1411	1401	1426	1364	1409	1412	1389	1455	1414	1468	1462	1417	1356	1482	1451	1443	1416	1479	1448	1423	1426	1403	1451	1389	1445	1489	1478	1506	1407	1500	1465	1484	1473	1500	1456	1459	1431
BCS10-1	1412	1463	1467	1396	1434	1498	1495	1416	1426	1473	1396	1450	1457	1480	1470	1536	1416	1502	1477	1490	1399	1503	1516	1508	1477	1446	1499	1411	1508	1414	1412	1537	1509	1463	1487	1538	1534	1448	1376	1462	1524	1459	1531	1494	1466	1483	1505	1551	1535
BCS10-2	1415	1394	1374	1383	1396	1424	1312	1437	1393	1418	1410	1394	1413	1398	1375	1392	1426	1400	1392	1432	1430	1428	1405	1444	1462	1454	1399	1346	1426	1360	1439	1445	1509	1463	1480	1390	1427	1376	1407	1489	1344	1374	1403	1411	1420	1443	1477	1463	1475
BCS11-1	1408	1343	1432	1373	1397	1391	1360	1400	1365	1357	1303	1444	1433	1427	1344	1473	1346	1414	1381	1335	1407	1437	1463	1409	1453	1476	1382	1445	1450	1469	1467	1397	1357	1452	1457	1400	1431	1495	1393	1438	1477	1395	1438	1393	1438	1415	1411	1539	1379
BCS11-2	1391	1414	1338	1386	1406	1371	1359	1408	1369	1378	1371	1418	1406	1377	1318	1385	1397	1352	1429	1414	1403	1436	1387	1410	1438	1351	1359	1393	1417	1393	1401	1407	1505	1397	1423	1436	1325	1389	1389	1433	1412	1419	1454	1420	1441	1460	1468	1475	1509
BCS14-1	1289	1359	1413	1418	1347	1324	1335	1421	1378	1443	1331	1287	1355	1391	1364	1334	1323	1409	1368	1387	1354	1381	1441	1408	1380	1406	1403	1447	1284	1426	1394	1342	1423	1363	1365	1410	1417	1458	1354	1319	1459	1412	1362	1400	1440	1421	1419	1385	1365
BCS14-2	1386	1380	1351	1427	1347	1381	1372	1450	1372	1347	1326	1385	1317	1348	1414	1433	1376	1401	1310	1411	1405	1425	1364	1386	1374	1414	1415	1399	1382	1458	1404	1390	1451	1385	1407	1376	1415	1458	1509	1380	1347	1291	1416	1339	1457	1434	1406	1411	1323
BCS16-1	1308	1383	1321	1394	1314	1244	1328	1376	1323	1317	1243	1353	1353	1354	1311	1366	1369	1418	1410	1348	1280	1313	1292	1337	1313	1345	1277	1356	1371	1414	1377	1314	1384	1290	1352	1352	1342	1380	1390	1353	1351	1326	1362	1345	1347	1370	1327	1402	1388
BCS16-2	1379	1345	1303	1319	1312	1350	1329	1304	1375	1326	1344	1259	1346	1364	1359	1377	1308	1304	1302	1324	1334	1325	1354	1356	1365	1400	1407	1339	1331	1285	1364	1364	1354	1324	1366	1351	1312	1352	1384	1405	1350	1351	1348	1371	1352	1348	1337	1331	1369
BCS17-1	1421	1408	1302	1326	1400	1375	1392	1390	1347	1427	1330	1380	1376	1404	1369	1395	1393	1352	1421	1384	1436	1442	1379	1400	1405	1418	1434	1383	1430	1310	1434	1437	1411	1486	1436	1406	1413	1322	1414	1382	1350	1410	1466	1436	1391	1435	1395	1498	1402
BCS17-2	1534	1523	1540	1476	1427	1476	1530	1514	1554	1562	1568	1497	1573	1582	1509	1519	1537	1475	1490	1557	1520	1548	1494	1475	1535	1471	1525	1469	1514	1543	1478	1561	1463	1433	1473	1525	1549	1549	1500	1545	1575	1493	1558	1451	1532	1526	1571	1615	1537
BCS19-1	1416	1330	1354	1393	1366	1459	1322	1360	1359	1351	1378	1376	1403	1367	1415	1346	1360	1363	1335	1391	1373	1351	1420	1386	1326	1432	1386	1332	1353	1376	1338	1270	1373	1357	1386	1459	1350	1348	1373	1279	1358	1286	1373	1367	1347	1418	1361	1405	1400
BCS19-2	1465	1426	1419	1407	1441	1444	1385	1429	1412	1399	1393	1376	1499	1391	1463	1457	1417	1485	1478	1410	1411	1425	1459	1399	1488	1423	1388	1397	1389	1460	1431	1487	1420	1381	1389	1420	1426	1453	1452	1407	1419	1375	1439	1471	1440	1488	1438	1367	1444
BCS20-1	1432	1450	1452	1462	1385	1446	1462	1502	1442	1424	1548	1508	1483	1473	1477	1443	1479	1424	1480	1491	1498	1502	1486	1469	1512	1528	1494	1448	1529	1413	1519	1464	1528	1491	1479	1447	1478	1430	1491	1541	1472	1475	1400	1505	1393	1532	1469	1517	1513
BCS20-2	1441	1441	1465	1425	1415	1438	1463	1433	1419	1405	1436	1444	1441	1382	1449	1424	1429	1437	1473	1392	1448	1468	1445	1495	1440	1448	1476	1476	1468	1468	1418	1442	1529	1407	1469	1460	1466	1450	1525	1417	1496	1463	1470	1484	1429	1460	1436	1505	1492
BCS23-1	1384	1426	1416	1336	1426	1452	1384	1454	1412	1414	1332	1424	1388	1364	1375	1447	1382	1362	1397	1396	1374	1378	1501	1399	1376	1356	1412	1412	1395	1478	1426	1411	1437	1412	1456	1456	1381	1435	1405	1437	1456	1511	1408	1409	1423	1459	1492	1501	1495
BCS23-2	1463	1511	1469	1516	1467	1449	1451	1463	1494	1505	1519	1507	1556	1490	1553	1517	1411	1530	1516	1514	1532	1552	1423	1520	1538	1482	1554	1514	1515	1503	1517	1543	1466	1465	1538	1500	1558	1522	1590	1524	1528	1516	1551	1542	1566	1494	1567	1611	1504
BCS25-1	1377	1366	1350	1316	1373	1440	1363	1448	1359	1373	1364	1447	1380	1390	1363	1338	1353	1354	1372	1341	1428	1443	1448	1405	1409	1419	1350	1356	1375	1411	1392	1387	1430	1445	1379	1388	1385	1383	1446	1439	1344	1426	1433	1378	1383	1455	1433	1450	1424
BCS25-2	1429	1476	1458	1419	1424	1409	1398	1395	1403	1427	1410	1339	1319	1424	1421	1462	1457	1436	1463	1422	1454	1481	1376	1415	1466	1435	1448	1451	1465	1467	1430	1388	1434	1410	1483	1439	1478	1409	1461	1539	1468	1480	1401	1502	1456	1415	1388	1547	1507
BCS26-1	1390	1377	1416	1377	1396	1393	1306	1384	1314	1392	1392	1422	1374	1344	1379	1367	1422	1390	1347	1398	1434	1420	1412	1408	1457	1416	1463	1365	1397	1415	1518	1486	1457	1409	1358	1440	1470	1398	1400	1411	1381	1398	1450	1443	1413	1449	1531	1402	1413
BCS26-2	1393	1354	1377	1354	1337	1354	1359	1335	1331	1351	1347	1316	1355	1350	1388	1345	1422	1369	1358	1382	1300	1342	1362	1427	1405	1340	1315	1385	1414	1335	1445	1365	1340	1444	1385	1296	1380	1446	1451	1383	1401	1365	1397	1382	1403	1401	1371	1362	1383
BCS28-1	1399	1433	1447	1391	1372	1426	1334	1375	1329	1423	1386	1409	1442	1415	1353	1501	1387	1373	1374	1376	1382	1400	1425	1407	1392	1447	1397	1463	1497	1470	1346	1465	1426	1382	1468	1442	1520	1446	1413	1474	1369	1442	1352	1433	1475	1412	1473	1396	1418
BCS28-2	1401	1416	1441	1433	1468	1404	1417	1442	1315	1396	1433	1425	1413	1473	1466	1395	1407	1431	1443	1470	1436	1442	1460	1414	1492	1423	1488	1439	1497	1472	1444	1494	1477	1426	1483	1458	1522	1440	1519	1401	1428	1537	1526	1450	1435	1508	1527	1480	1480
BCS29-1	1392	1362	1326	1412	1343	1387	1413	1359	1377	1407	1413	1420	1349	1314	1391	1382	1386	1435	1392	1434	1379	1416	1418	1459	1348	1424	1458	1325	1479	1399	1475	1336	1376	1375	1392	1475	1332	1426	1391	1432	1472	1418	1462	1395	1366	1418	1424	1407	1422
BCS29-2	1481	1454	1475	1465	1525	1455	1415	1431	1585	1509	1483	1480	1471	1469	1468	1495	1549	1457	1497	1525	1553	1452	1493	1524	1435	1511	1439	1461	1495	1496	1507	1482	1505	1406	1532	1605	1517	1528	1529	1539	1498	1503	1530	1513	1503	1571	1462	1489	1516
BCS31-1	1512	1424	1413	1462	1444	1399	1423	1415	1436	1445	1420	1458	1414	1410	1439	1353	1418	1389	1475	1392	1472	1455	1454	1450	1444	1453	1444	1390	1451	1424	1436	1468	1395	1412	1507	1474	1495	1474	1498	1512	1489	1462	1459	1474	1537	1402	1537	1456	1478
BCS31-2	1396	1407	1370	1400	1383	1444	1451	1440	1502	1431	1445	1440	1417	1409	1449	1491	1396	1415	1445	1362	1409	1434	1380	1392	1417	1464	1425	1425	1516	1423	1433	1452	1389	1383	1399	1424	1462	1482	1468	1454	1408	1447	1411	1552	1497	1453	1500	1463	1430
BCS32-1	1351	1322	1305	1343	1374	1370	1312	1348	1339	1318	1394	1366	1352	1338	1334	1345	1359	1438	1310	1322	1382	1342	1296	1388	1324	1372	1379	1381	1402	1376	1414	1384	1354	1399	1423	1380	1395	1423	1391	1406	1413	1401	1446	1340	1397	1411	1375	1373	1380
BCS32-2	1405	1386	1431	1429	1414	1377	1407	1413	1379	1376	1409	1383	1421	1420	1368	1357	1406	1364	1361	1378	1387	1415	1397	1399	1477	1445	1368	1430	1357	1388	1412	1374	1459	1359	1404	1402	1434	1375	1453	1372	1452	1427	1389	1399	1467	1445	1420	1451	1412
BCS34-1	1408	1440	1413	1459	1362	1367	1463	1427	1389	1410	1428	1385	1444	1391	1378	1404	1410	1421	1420	1398	1319	1409	1527	1468	1474	1441	1457	1403	1411	1434	1521	1443	1489	1390	1422	1374	1377	1368	1374	1428	1437	1455	1367	1415	1405	1437	1454	1485	1406
BCS34-2	1435	1416	1408	1443	1412	1382	1490	1500	1477	1398	1462	1442	1482	1395	1392	1395	1401	1435	1400	1441	1478	1485	1468	1391	1397	1392	1462	1478	1362	1407	1465	1461	1442	1388	1506	1437	1426	1463	1450	1574	1480	1470	1414	1482	1445	1387	1387	1430	1487
BCS37-1	1443	1467	1386	1352	1455	1389	1334	1455	1374	1407	1416	1439	1389	1367	1377	1399	1424	1386	1472	1378	1475	1412	1374	1404	1447	1435	1391	1352	1432	1378	1391	1387	1400	1503	1448	1388	1474	1383	1356	1426	1421	1488	1335	1434	1446	1384	1471	1355	1431
BCS37-2	1398	1400	1374	1337	1383	1396	1380	1394	1330	1313	1325	1421	1356	1405	1358	1391	1404	1415	1401	1422	1441	1388	1419	1324	1363	1372	1437	1381	1339	1438	1391	1417	1418	1380	1353	1450	1410	1413	1393	1386	1393	1403	1419	1435	1434	1384	1437	1445	1464
BCS44-1	1488	1514	1508	1456	1460	1464	1488	1458	1467	1451	1411	1457	1416	1412	1415	1509	1487	1461	1426	1501	1467	1421	1523	1474	1420	1490	1470	1436	1480	1439	1446	1491	1469	1458	1489	1484	1507	1513	1471	1531	1531	1529	1467	1497	1515	1509	1550	1500	1511
BCS44-2	1427	1436	1433	1418	1436	1389	1368	1351	1388	1389	1434	1400	1386	1390	1418	1443	1519	1383	1429	1403	1483	1489	1440	1456	1414	1416	1378	1440	1524	1487	1387	1444	1456	1469	1498	1418	1471	1460	1436	1548	1489	1423	1467	1443	1466	1449	1414	1472	1481
BCS46-1	1384	1374	1394	1303	1303	1313	1358	1343	1352	1344	1402	1298	1338	1294	1290	1388	1393	1334	1390	1304	1339	1272	1331	1303	1401	1347	1398	1383	1370	1379	1385	1326	1271	1348	1354	1311	1337	1323	1398	1390	1342	1384	1423	1375	1423	1322	1376	1373	1378
BCS46-2	1305	1295	1293	1315	1310	1395	1341	1333	1266	1369	1289	1347	1437	1373	1388	1271	1352	1371	1356	1361	1353	1325	1359	1269	1386	1374	1321	1295	1361	1382	1356	1403	1362	1364	1340	1338	1314	1329	1368	1408	1357	1411	1358	1343	1323	1370	1366	1372	1376
BCS53-1	1468	1450	1455	1439	1488	1411	1450	1435	1462	1445	1473	1485	1532	1460	1427	1466	1482	1459	1452	1520	1485	1447	1525	1454	1512	1493	1436	1548	1489	1459	1538	1530	1466	1466	1465	1418	1552	1559	1561	1535	1578	1550	1560	1533	1562	1511	1522	1521	1599
BCS53-2	1539	1510	1545	1500	1568	1596	1562	1520	1574	1580	1573	1581	1573	1563	1670	1590	1600	1588	1580	1628	1585	1572	1629	1615	1586	1612	1613	1657	1607	1542	1571	1691	1654	1682	1631	1680	1646	1605	1647	1632	1648	1630	1568	1615	1736	1618	1740	1654	1661
BCS59-1	1442	1400	1410	1413	1347	1391	1415	1388	1376	1444	1435	1386	1444	1373	1453	1375	1421	1417	1406	1417	1469	1438	1427	1429	1508	1423	1437	1501	1470	1431	1457	1478	1494	1467	1450	1377	1380	1489	1408	1490	1456	1587	1535	1515	1502	1484	1515	1482	1562
BCS59-2	1443	1419	1516	1486	1448	1469	1589	1457	1540	1470	1521	1452	1465	1535	1459	1520	1501	1484	1493	1451	1478	1502	1522	1503	1535	1527	1511	1447	1558	1564	1529	1578	1509	1546	1509	1596	1574	1551	1577	1545	1479	1560	1651	1510	1616	1609	1578	1588	1653
BCS68-1	1317	1349	1323	1307	1231	1300	1303	1366	1293	1273	1387	1317	1369	1317	1332	1265	1294	1357	1388	1312	1296	1291	1268	1406	1363	1322	1366	1386	1390	1359	1384	1329	1325	1380	1337	1360	1374	1332	1382	1367	1358	1386	1420	1403	1323	1341	1438	1339	1377
BCS68-2	1440	1490	1478	1394	1441	1392	1421	1411	1423	1451	1503	1466	1435	1465	1399	1488	1421	1517	1478	1480	1489	1497	1505	1534	1424	1534	1410	1616	1425	1519	1560	1433	1521	1462	1497	1543	1588	1549	1495	1512	1522	1552	1458	1457	1518	1532	1572	1536	1506
BCS69-1	1266	1352	1240	1279	1322	1323	1240	1386	1228	1293	1263	1335	1271	1291	1288	1339	1241	1333	1362	1272	1241	1289	1308	1279	1222	1283	1299	1263	1294	1287	1298	1277	1255	1322	1300	1289	1297	1312	1271	1311	1353	1265	1311	1318	1274	1220	1305	1267	1274
BCS69-2	1338	1316	1354	1388	1310	1338	1373	1376	1334	1345	1341	1287	1307	1323	1359	1278	1313	1309	1264	1371	1293	1351	1353	1390	1339	1392	1251	1340	1272	1270	1376	1305	1269	1316	1303	1320	1375	1286	1371	1317	1369	1315	1242	1361	1323	1334	1332	1356	1287
BCS70-1	1334	1254	1284	1218	1277	1341	1298	1208	1305	1327	1261	1384	1266	1316	1313	1265	1293	1263	1307	1381	1294	1311	1288	1307	1307	1341	1277	1334	1282	1302	1286	1329	1295	1280	1253	1342	1377	1313	1314	1352	1193	1283	1303	1317	1290	1245	1334	1330	1327
BCS70-2	1409	1382	1431	1369	1409	1423	1423	1470	1370	1391	1442	1428	1318	1454	1448	1482	1348	1379	1396	1402	1384	1459	1360	1441	1472	1375	1422	1413	1425	1415	1450	1480	1471	1361	1418	1402	1547	1491	1451	1443	1435	1473	1423	1477	1456	1487	1485	1459	1455
BCS71-1	1304	1335	1342	1333	1329	1274	1305	1323	1316	1309	1365	1342	1315	1299	1306	1351	1339	1262	1335	1304	1358	1313	1257	1351	1245	1336	1302	1288	1342	1405	1359	1325	1278	1360	1391	1348	1420	1353	1276	1382	1341	1307	1347	1296	1338	1377	1256	1357	1251
BCS71-2	1356	1359	1398	1383	1333	1352	1285	1370	1419	1384	1339	1352	1272	1386	1383	1426	1351	1361	1385	1415	1404	1440	1350	1361	1363	1424	1398	1360	1387	1425	1413	1361	1345	1316	1331	1381	1381	1398	1406	1335	1410	1363	1412	1363	1407	1344	1413	1343	1385
BCS72-1	1357	1378	1336	1446	1424	1350	1335	1396	1410	1370	1458	1381	1394	1460	1377	1342	1379	1300	1366	1343	1392	1315	1399	1330	1329	1396	1346	1378	1401	1424	1400	1330	1393	1359	1397	1399	1390	1436	1383	1402	1441	1433	1389	1406	1381	1438	1396	1425	1361
BCS72-2	1385	1413	1386	1386	1421	1433	1438	1380	1409	1382	1380	1422	1371	1397	1460	1385	1424	1441	1346	1400	1454	1449	1438	1479	1466	1411	1413	1411	1441	1376	1443	1411	1376	1460	1495	1425	1421	1455	1491	1383	1423	1461	1421	1440	1400	1465	1470	1413	1461
BCS73-1	1438	1428	1432	1424	1431	1401	1426	1484	1335	1329	1401	1503	1440	1356	1400	1383	1437	1415	1447	1433	1433	1445	1339	1372	1444	1450	1382	1394	1427	1411	1413	1453	1367	1414	1458	1511	1454	1436	1456	1471	1465	1436	1435	1498	1457	1460	1489	1550	1404
BCS73-2	1439	1561	1394	1403	1445	1482	1441	1495	1491	1451	1478	1441	1473	1456	1442	1436	1445	1462	1436	1449	1426	1400	1505	1468	1482	1487	1398	1466	1527	1490	1468	1568	1407	1450	1498	1462	1567	1552	1523	1525	1398	1578	1490	1499	1497	1485	1557	1545	1555
BCS75-1	1361	1448	1463	1426	1423	1327	1461	1410	1440	1438	1443	1380	1489	1453	1469	1478	1476	1437	1452	1445	1404	1419	1395	1399	1391	1455	1451	1401	1487	1383	1400	1372	1479	1468	1429	1504	1440	1463	1489	1483	1554	1502	1489	1484	1420	1455	1480	1536	1488
BCS75-2	1315	1329	1382	1394	1339	1397	1350	1332	1322	1348	1308	1347	1315	1357	1394	1349	1333	1333	1390	1324	1434	1367	1464	1330	1415	1373	1367	1359	1330	1303	1387	1404	1422	1385	1402	1353	1391	1396	1431	1348	1327	1431	1396	1377	1434	1419	1372	1395	1354
BCS76-1	1420	1349	1389	1445	1435	1423	1413	1437	1442	1349	1402	1385	1425	1442	1478	1507	1402	1410	1443	1484	1411	1441	1446	1474	1436	1411	1489	1451	1486	1495	1459	1445	1440	1510	1410	1474	1462	1501	1470	1505	1500	1491	1505	1599	1463	1480	1418	1507	1430
BCS76-2	1416	1407	1500	1383	1441	1444	1505	1436	1486	1446	1418	1418	1403	1471	1445	1397	1411	1390	1461	1396	1444	1451	1430	1444	1501	1512	1517	1421	1483	1483	1459	1483	1514	1469	1547	1561	1521	1466	1467	1487	1477	1526	1488	1483	1481	1526	1518	1584	1518
BCS77-1	1505	1420	1499	1462	1494	1448	1521	1460	1476	1463	1480	1544	1457	1402	1463	1415	1535	1493	1555	1515	1452	1485	1514	1504	1488	1516	1398	1488	1456	1482	1422	1476	1469	1477	1506	1521	1544	1468	1494	1511	1520	1521	1499	1433	1493	1490	1445	1526	1493
BCS77-2	1422	1348	1341	1421	1428	1376	1482	1439	1466	1446	1422	1479	1416	1439	1453	1463	1442	1389	1425	1430	1426	1403	1404	1478	1462	1417	1451	1396	1502	1456	1488	1439	1418	1453	1352	1438	1498	1449	1453	1395	1564	1525	1494	1519	1504	1443	1477	1553	1470
BCS78-1	1460	1449	1435	1438	1496	1455	1461	1417	1458	1421	1485	1439	1483	1461	1448	1528	1440	1440	1433	1440	1486	1498	1522	1458	1469	1483	1463	1475	1455	1468	1506	1458	1520	1515	1475	1474	1465	1466	1468	1518	1470	1374	1477	1508	1452	1455	1458	1456	1476
BCS78-2	1354	1451	1318	1352	1430	1332	1398	1368	1396	1403	1399	1352	1441	1389	1320	1371	1313	1402	1368	1347	1419	1388	1356	1351	1325	1461	1369	1409	1374	1384	1358	1381	1392	1382	1344	1420	1417	1454	1419	1377	1386	1335	1393	1367	1313	1425	1380	1416	1391
BCS79-1	1406	1463	1431	1335	1464	1488	1413	1413	1453	1410	1415	1445	1363	1406	1394	1375	1459	1391	1512	1398	1414	1537	1460	1404	1430	1469	1466	1484	1426	1395	1490	1459	1426	1520	1526	1499	1576	1521	1467	1448	1505	1477	1476	1434	1610	1508	1505	1478	1455
BCS79-2	1509	1525	1485	1380	1450	1516	1511	1431	1460	1481	1478	1510	1504	1443	1439	1537	1463	1458	1519	1487	1587	1455	1575	1570	1457	1420	1454	1548	1555	1510	1480	1544	1526	1573	1450	1468	1547	1544	1484	1469	1497	1519	1580	1565	1583	1563	1475	1559	1553
BCS80-1	1410	1326	1379	1406	1489	1410	1403	1383	1384	1377	1421	1423	1407	1394	1401	1385	1481	1432	1410	1392	1363	1431	1430	1395	1483	1400	1382	1417	1413	1394	1417	1480	1465	1411	1440	1415	1330	1378	1408	1398	1364	1394	1419	1457	1450	1435	1468	1393	1471
BCS80-2	1452	1426	1390	1449	1402	1392	1452	1460	1428	1369	1421	1402	1515	1396	1411	1424	1455	1452	1482	1430	1398	1487	1461	1396	1462	1442	1520	1448	1420	1398	1447	1444	1429	1477	1413	1442	1458	1495	1470	1496	1439	1476	1451	1505	1397	1407	1499	1519	1484
BCS82-1	1488	1521	1502	1508	1506	1512	1463	1391	1437	1484	1430	1474	1485	1469	1497	1488	1451	1478	1482	1575	1507	1465	1508	1431	1504	1458	1472	1456	1446	1470	1501	1470	1518	1483	1530	1468	1517	1530	1461	1491	1516	1525	1586	1428	1484	1539	1534	1472	1491
BCS82-2	1413	1380	1478	1429	1387	1421	1441	1445	1422	1469	1407	1483	1484	1491	1505	1478	1457	1445	1526	1499	1493	1481	1411	1381	1450	1435	1479	1492	1548	1543	1502	1406	1478	1452	1490	1482	1502	1493	1449	1489	1437	1485	1551	1487	1504	1469	1428	1488	1472
BCS83-1	1531	1567	1594	1564	1504	1644	1567	1562	1464	1565	1485	1610	1580	1517	1553	1593	1546	1582	1579	1552	1587	1586	1587	1569	1549	1584	1567	1603	1680	1652	1632	1596	1628	1574	1577	1611	1566	1676	1554	1601	1643	1660	1621	1672	1661	1642	1681	1684	1596
BCS83-2	1595	1622	1573	1581	1530	1618	1587	1622	1529	1521	1561	1564	1555	1608	1598	1636	1557	1594	1604	1630	1603	1552	1563	1697	1622	1644	1695	1534	1611	1643	1629	1676	1595	1586	1616	1630	1574	1600	1635	1588	1662	1643	1611	1656	1603	1620	1632	1664	1657
BCS84-1	1524	1509	1530	1458	1537	1644	1496	1525	1486	1530	1476	1530	1493	1482	1485	1577	1502	1528	1551	1541	1582	1552	1542	1602	1495	1560	1566	1454	1547	1543	1582	1574	1588	1498	1624	1528	1420	1503	1562	1545	1529	1598	1562	1581	1499	1494	1509	1601	1638
BCS84-2	1500	1378	1478	1519	1555	1552	1525	1448	1512	1498	1500	1439	1513	1533	1485	1445	1517	1469	1508	1554	1449	1497	1426	1498	1499	1571	1439	1512	1559	1491	1545	1587	1488	1520	1546	1581	1544	1588	1433	1564	1470	1540	1582	1468	1587	1488	1490	1553	1598
BCS85-1	1397	1475	1475	1332	1396	1420	1374	1412	1423	1439	1407	1413	1435	1491	1409	1423	1422	1546	1397	1433	1452	1463	1480	1506	1393	1476	1440	1432	1475	1452	1427	1468	1486	1504	1469	1458	1506	1502	1413	1443	1535	1508	1434	1489	1406	1468	1476	1474	1450
BCS85-2	1449	1458	1442	1464	1482	1421	1367	1440	1447	1417	1517	1409	1514	1420	1455	1539	1451	1476	1443	1449	1473	1454	1475	1431	1479	1484	1424	1454	1431	1454	1466	1425	1458	1479	1430	1510	1479	1472	1414	1495	1488	1504	1437	1489	1474	1480	1489	1528	1511
BCS86-1	1545	1470	1495	1476	1472	1538	1472	1422	1471	1496	1508	1492	1510	1445	1463	1507	1479	1549	1470	1481	1509	1400	1545	1592	1390	1469	1544	1562	1457	1545	1542	1604	1553	1476	1486	1583	1596	1501	1592	1543	1560	1524	1490	1590	1607	1585	1547	1588	1573
BCS86-2	1497	1562	1513	1470	1528	1510	1434	1501	1558	1578	1531	1573	1500	1514	1589	1557	1532	1631	1634	1543	1619	1560	1626	1587	1583	1495	1579	1509	1460	1531	1588	1595	1641	1516	1603	1587	1612	1552	1606	1670	1674	1608	1685	1625	1614	1651	1521	1589	1519
BCS87-1	1516	1474	1585	1488	1476	1550	1521	1510	1549	1514	1542	1532	1606	1574	1544	1595	1557	1539	1589	1590	1574	1553	1614	1521	1501	1591	1559	1560	1513	1619	1595	1583	1629	1574	1559	1516	1542	1593	1549	1544	1568	1573	1515	1594	1632	1629	1612	1612	1576
BCS87-2	1511	1437	1550	1443	1397	1420	1493	1472	1504	1455	1495	1496	1514	1437	1519	1511	1494	1479	1472	1591	1584	1482	1572	1519	1514	1556	1481	1557	1531	1537	1552	1482	1569	1493	1563	1478	1539	1536	1510	1523	1472	1549	1570	1570	1518	1630	1583	1583	1553
BCS96-1	1531	1505	1552	1527	1482	1572	1533	1498	1434	1501	1508	1512	1534	1406	1519	1485	1466	1525	1516	1503	1540	1595	1607	1578	1584	1488	1497	1484	1540	1520	1510	1524	1604	1514	1524	1542	1574	1661	1528	1576	1486	1557	1601	1586	1548	1566	1523	1506	1565
BCS96-2	1471	1419	1480	1421	1363	1458	1445	1391	1482	1390	1409	1415	1433	1470	1400	1470	1422	1469	1483	1422	1410	1444	1443	1480	1500	1465	1503	1571	1458	1519	1427	1500	1453	1372	1415	1406	1521	1432	1521	1505	1407	1435	1507	1500	1519	1461	1556	1503	1510
BCS97-1	1513	1545	1491	1476	1526	1550	1536	1512	1515	1575	1514	1547	1524	1535	1516	1505	1498	1493	1490	1518	1519	1522	1481	1520	1445	1498	1534	1597	1624	1497	1534	1527	1570	1623	1563	1498	1564	1583	1508	1607	1462	1568	1563	1595	1576	1577	1600	1532	1559
BCS97-2	1567	1468	1440	1498	1394	1413	1500	1546	1472	1476	1497	1419	1473	1520	1543	1536	1510	1481	1443	1454	1442	1471	1509	1490	1478	1495	1477	1535	1526	1505	1451	1484	1538	1565	1566	1563	1529	1586	1482	1514	1539	1558	1523	1562	1572	1539	1541	1507	1589
BCS98-1	1613	1567	1607	1564	1613	1669	1621	1554	1627	1612	1599	1650	1685	1672	1663	1577	1639	1616	1667	1636	1599	1672	1645	1609	1697	1575	1690	1619	1631	1524	1698	1680	1677	1702	1738	1661	1681	1704	1780	1747	1646	1731	1663	1720	1676	1666	1721	1759	1761
BCS98-2	1544	1512	1556	1580	1561	1509	1536	1509	1572	1565	1583	1585	1561	1524	1585	1502	1549	1604	1608	1578	1593	1570	1641	1609	1558	1628	1521	1612	1607	1625	1602	1631	1587	1551	1569	1668	1614	1502	1631	1593	1639	1690	1600	1678	1633	1621	1683	1684	1636
cryst alpha	1291	1448	1387	1369	1343	1386	1390	1274	1444	1333	1378	1423	1390	1402	1369	1346	1373	1376	1308	1402	1378	1464	1406	1287	1365	1316	1315	1280	1427	1378	1366	1340	1334	1371	1364	1436	1331	1354	1377	1313	1377	1350	1395	1368	1394	1389	1411	1442	1362
cryst gamma	1160	1241	1262	1260	1317	1260	1276	1222	1258	1274	1246	1258	1288	1271	1332	1286	1270	1249	1281	1264	1225	1320	1337	1303	1339	1311	1272	1338	1287	1323	1285	1292	1312	1212	1308	1281	1312	1349	1271	1286	1358	1302	1280	1316	1353	1283	1321	1343	1271
cryst nap	1299	1237	1364	1305	1266	1341	1340	1343	1291	1359	1341	1277	1354	1361	1312	1334	1357	1376	1383	1325	1378	1349	1325	1362	1337	1307	1398	1301	1325	1338	1411	1390	1347	1373	1402	1403	1398	1415	1454	1467	1481	1399	1425	1457	1410	1462	1411	1469	1481
NAPIND-1	1674	1616	1664	1626	1623	1624	1607	1660	1684	1584	1632	1654	1666	1601	1602	1677	1622	1623	1618	1649	1715	1650	1663	1703	1660	1652	1653	1671	1644	1726	1733	1696	1724	1660	1698	1738	1731	1745	1777	1645	1752	1759	1677	1764	1761	1629	1724	1727	1753
NAPIND-2	1543	1547	1581	1500	1589	1575	1576	1615	1508	1574	1565	1657	1584	1519	1567	1673	1501	1570	1686	1626	1567	1592	1591	1592	1574	1591	1567	1537	1546	1643	1586	1682	1637	1584	1643	1611	1568	1614	1587	1648	1563	1631	1618	1597	1654	1656	1647	1662	1707
[truncated: 2,236 more columns]
